# Supplementary figures and images for: Construction and Validation of a Necroptosis-Related Gene Signature for Predicting Prognosis and Tumor Microenvironment of Pancreatic Cancer
Source: Hindawi journal article supplement (doi:10.1155/2022/9737587), 2022-06-14

A

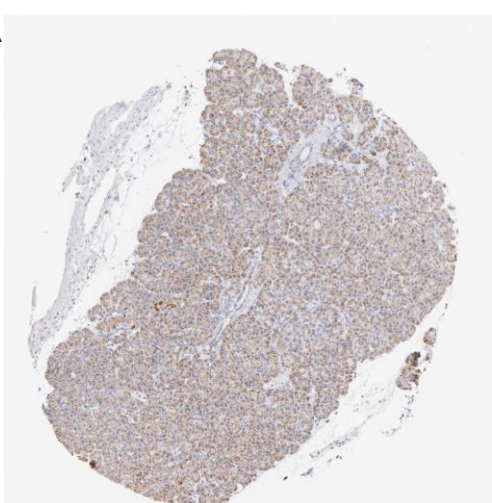

B

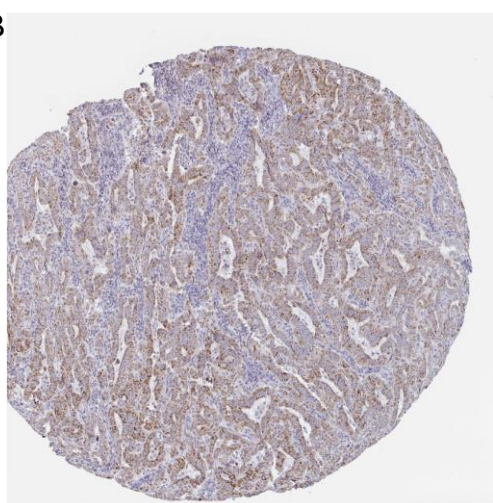

C

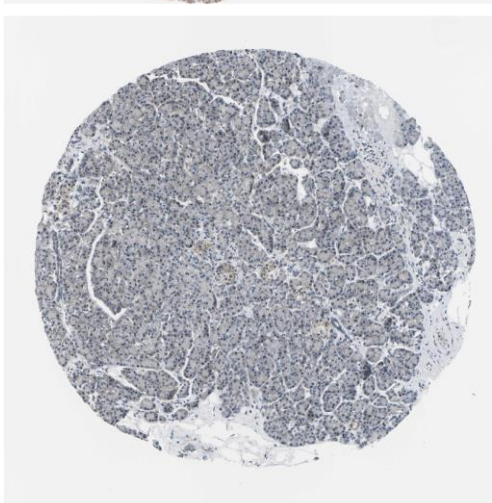

D

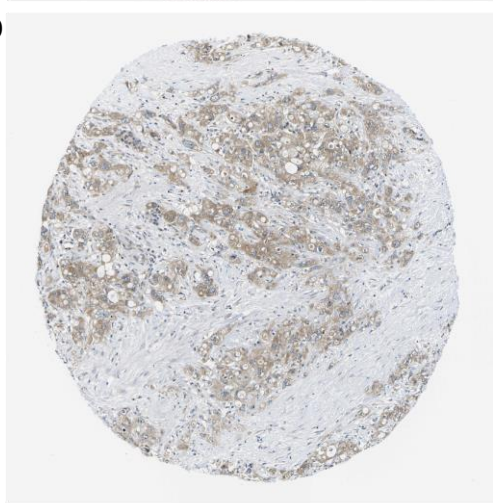

E

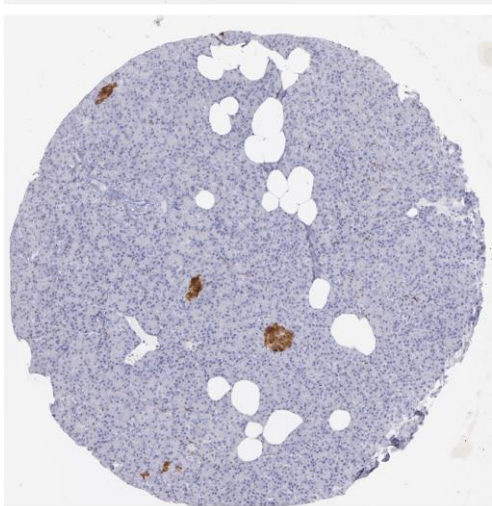

F

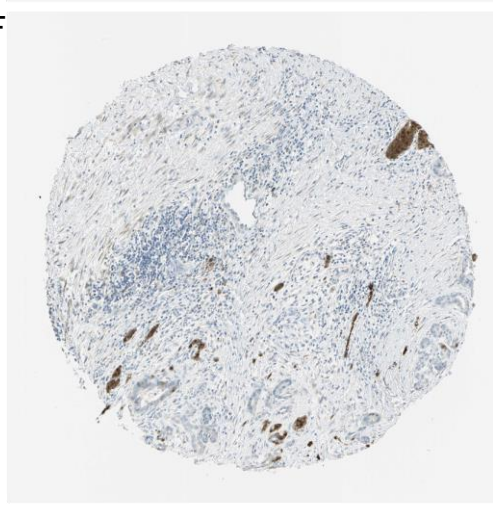

Supplement: f1 [file 9737587.f1.zip]

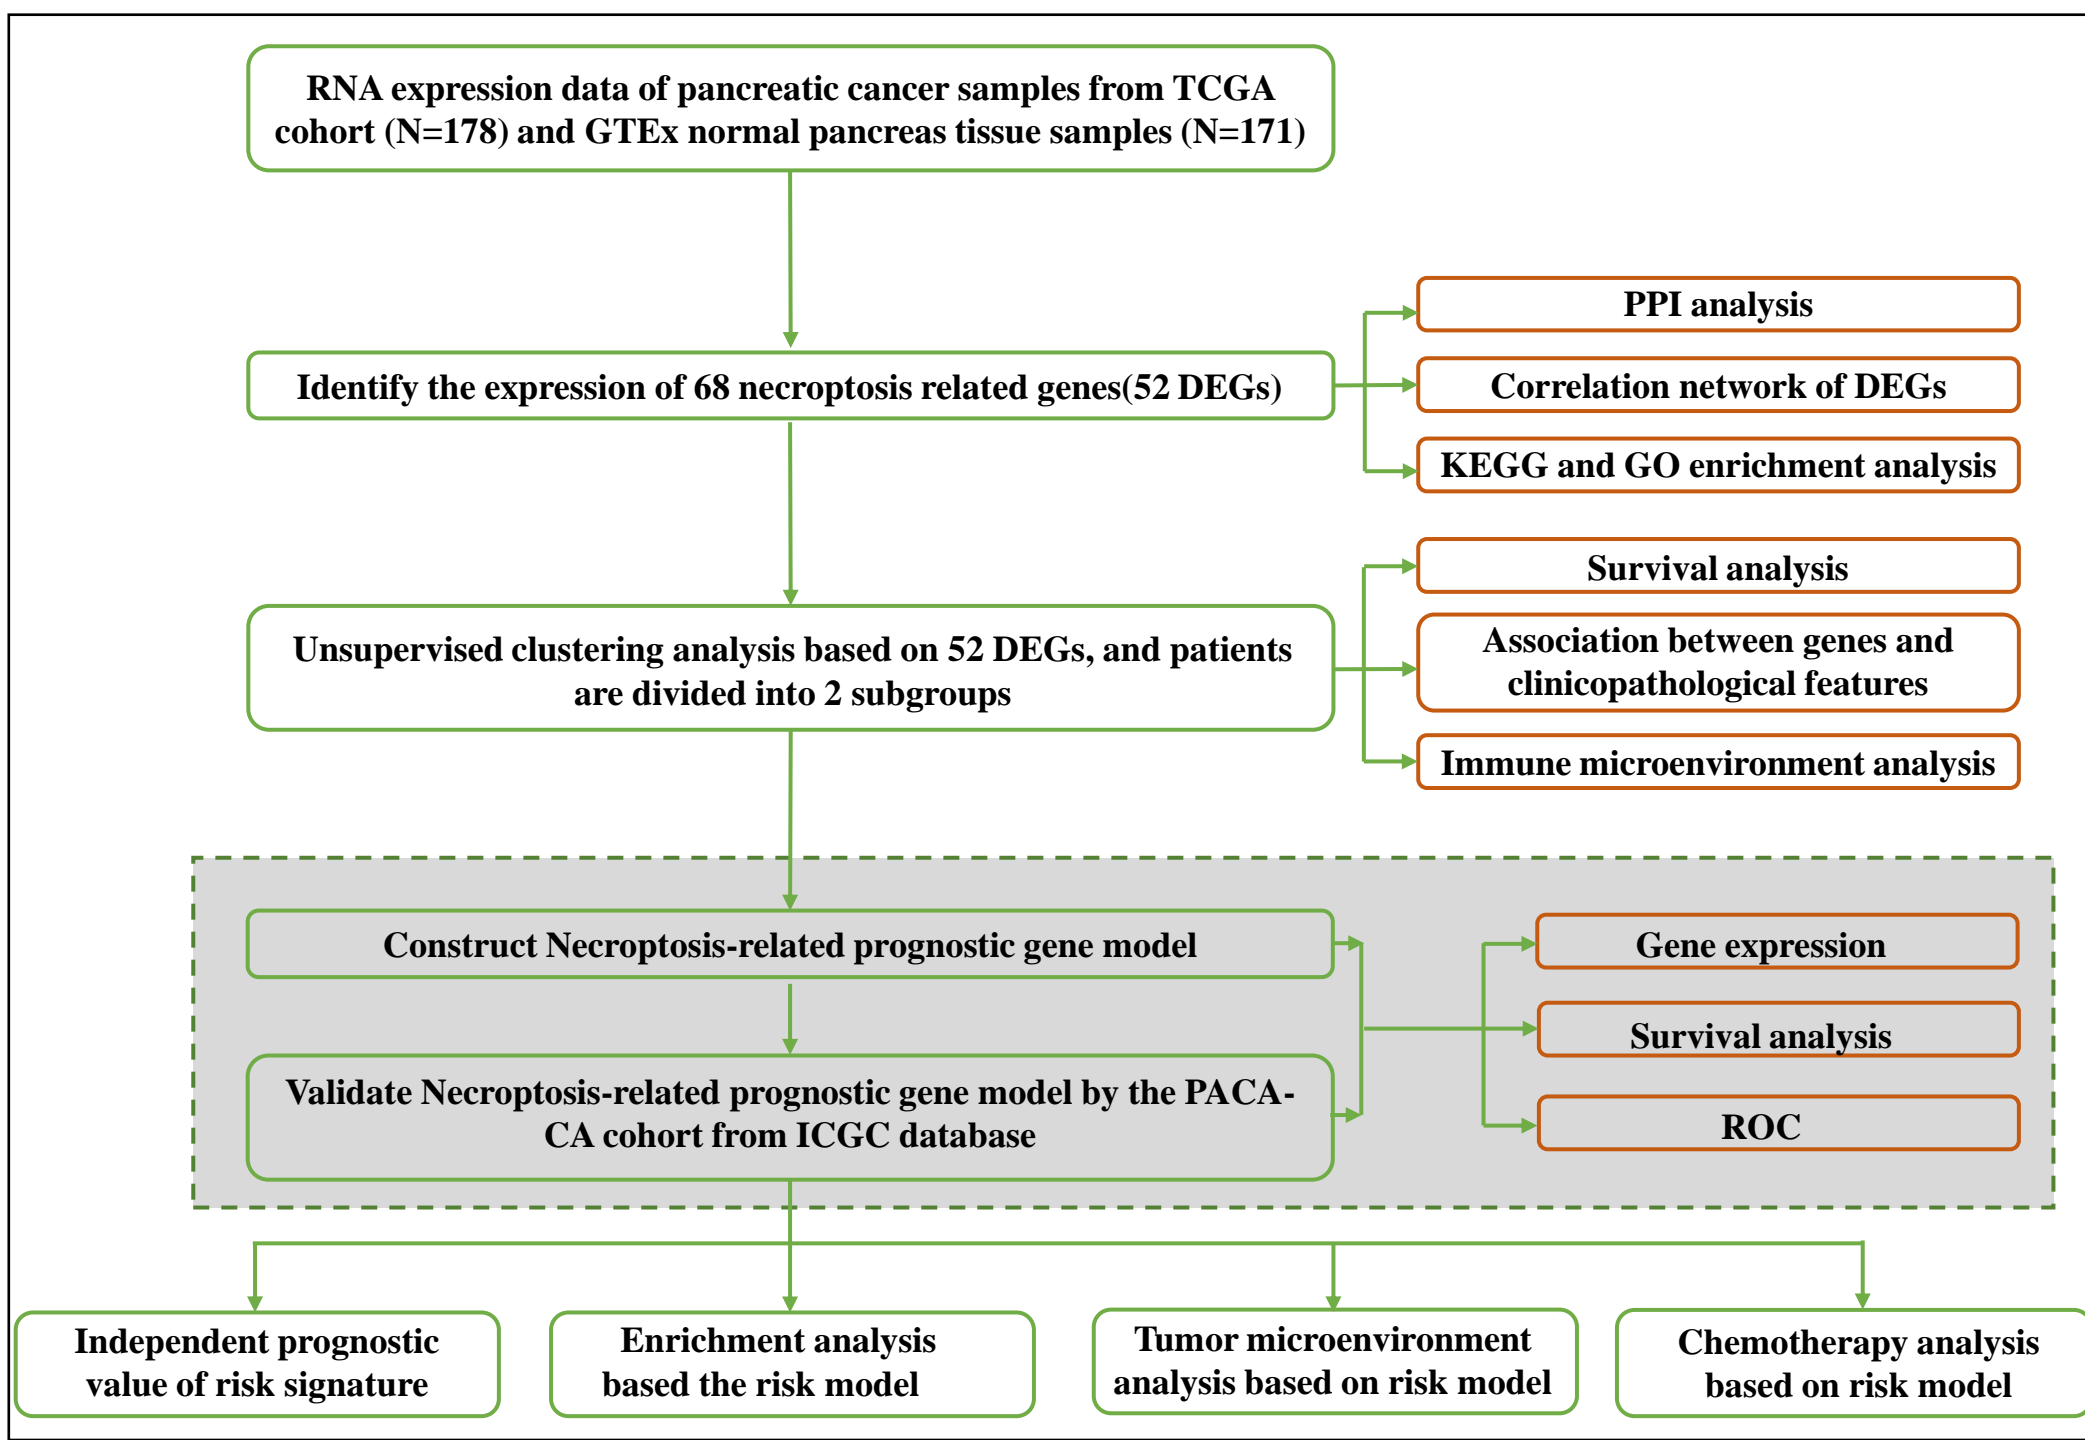

Supplement: f1 [file 9737587.f1.zip]

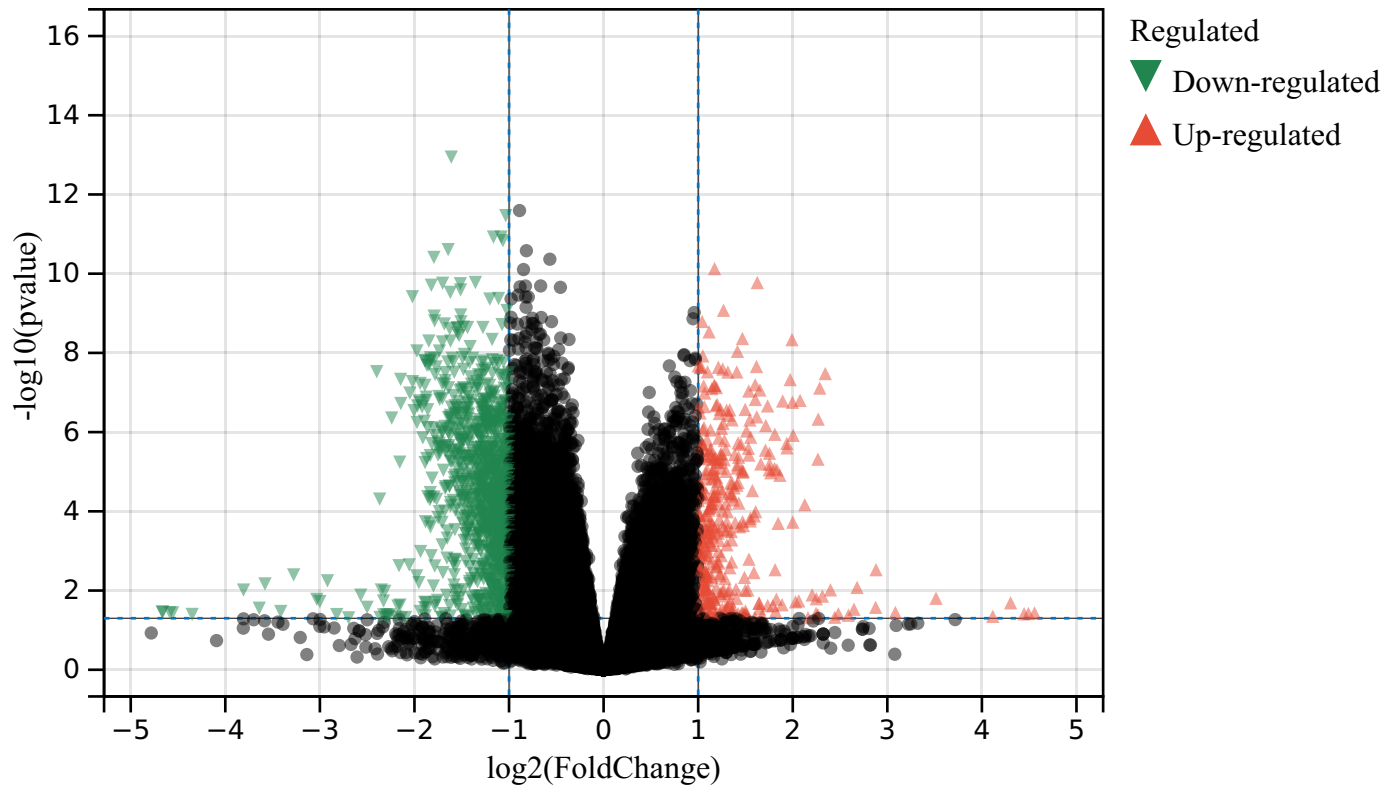

Supplement: f1 [file 9737587.f1.zip]

A

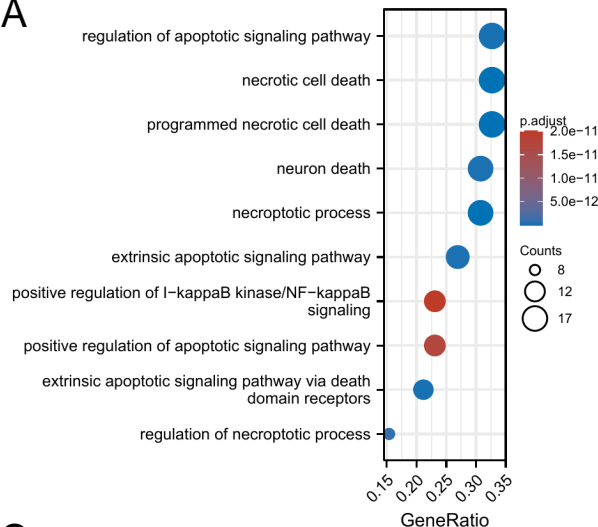

B

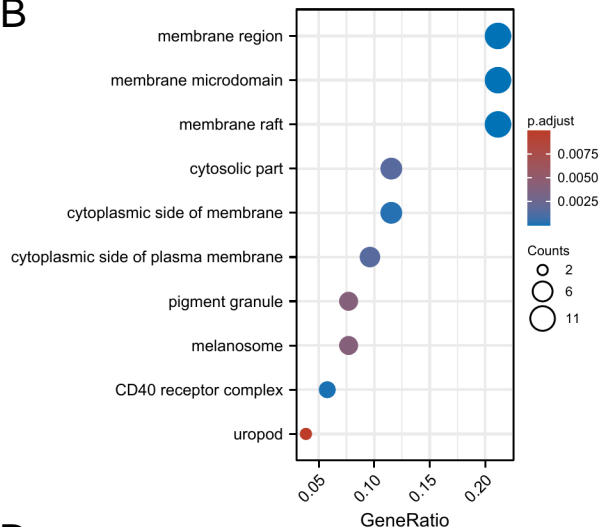

C

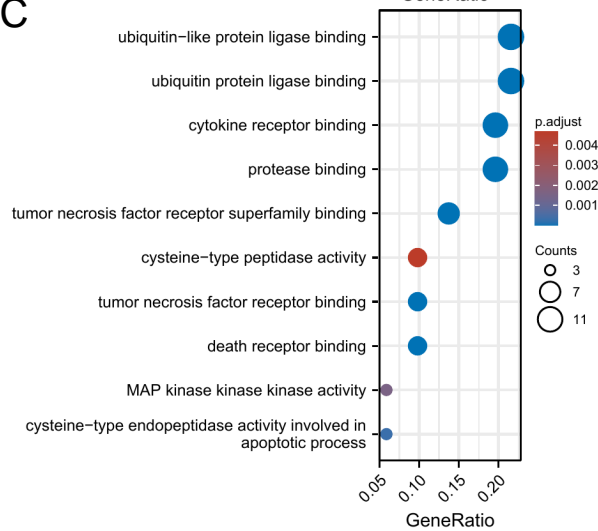

D

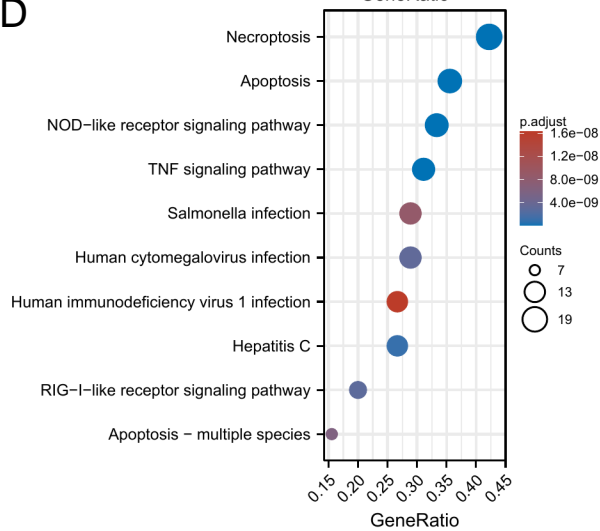

Supplement: f1 [file 9737587.f1.zip]

A

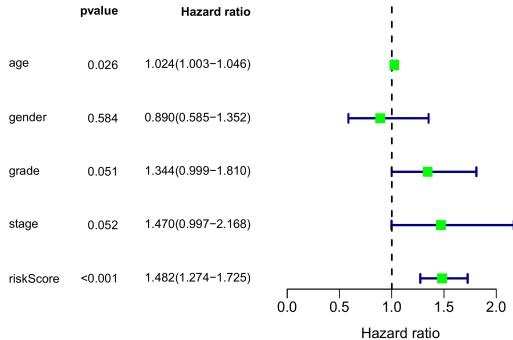

B

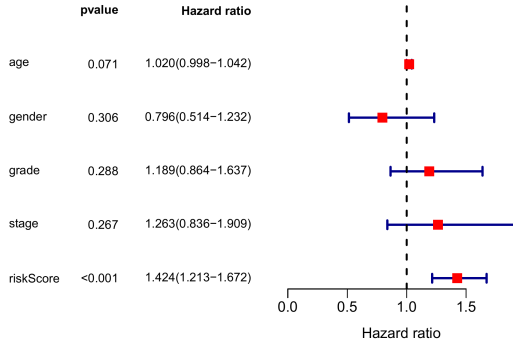

Supplement: f1 [file 9737587.f1.zip]

**A**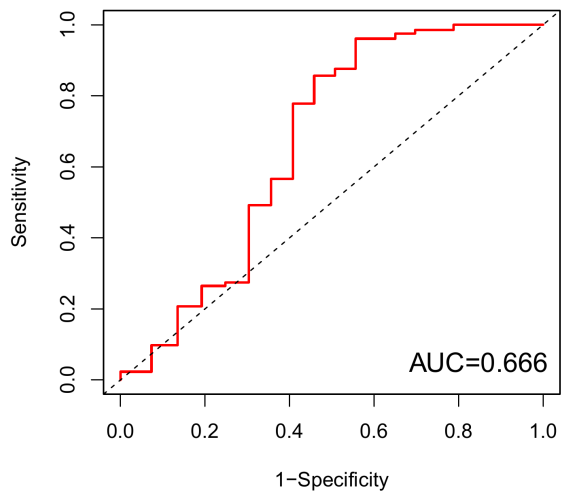**B**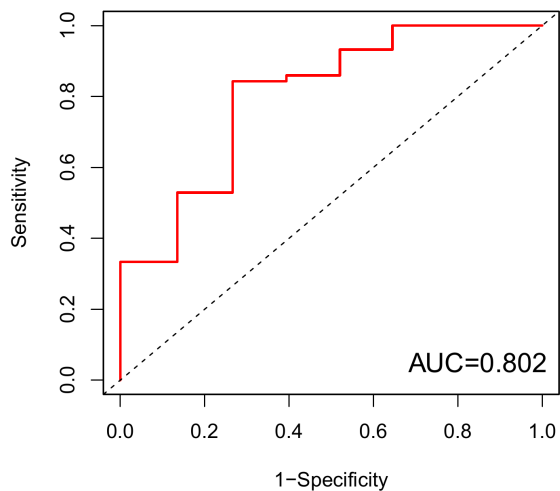**C**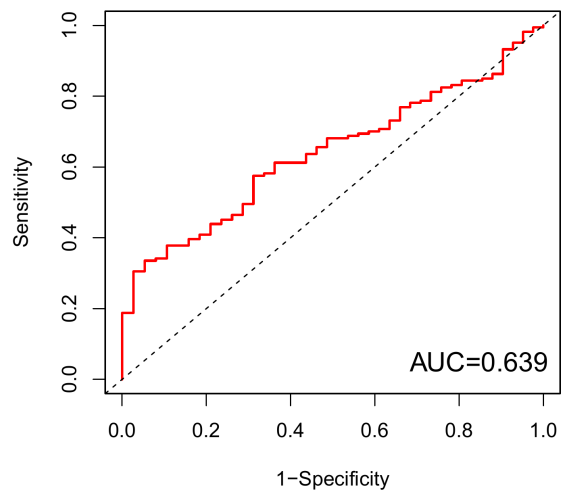**D**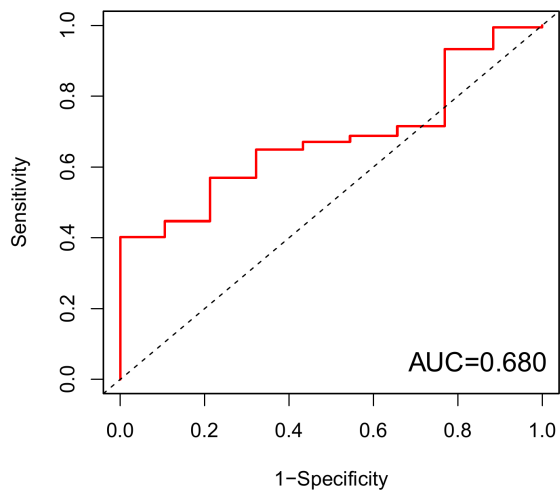

Supplement: f1 [file 9737587.f1.zip]
